# Supplementary material for: Stable zinc anode by regulating the solvated shell and electrode–electrolyte interface with a sodium tartrate additive
Source: Royal Society of Chemistry journal article supplement (doi:10.1039/d3im00111c), 2023-12-19
Supplement: d3im00111c1.pdf [file d3im00111c1.pdf]

## Supplementary Material

### **Stable zinc anode by regulating solvated shell and electrode-electrolyte interface with sodium tartrate additive**

Jie Ren,<sup>a</sup> Hai-Yang Wu,<sup>a</sup> Wen Yan,<sup>a</sup> Peng Huang,<sup>\*a</sup> Chao Lai<sup>\*a</sup>

<sup>a</sup> School of Chemistry and Materials Science, Jiangsu Normal University, Xuzhou, Jiangsu 221116, China.

E-mail: [laichao@jsnu.edu.cn](mailto:laichao@jsnu.edu.cn) ; [huangpeng@jsnu.edu.cn](mailto:huangpeng@jsnu.edu.cn)

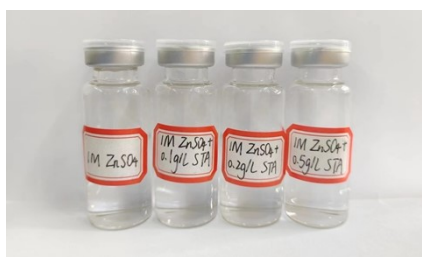

**Fig. S1** 1 mol L<sup>-1</sup> ZnSO<sub>4</sub> containing different concentration of STA.

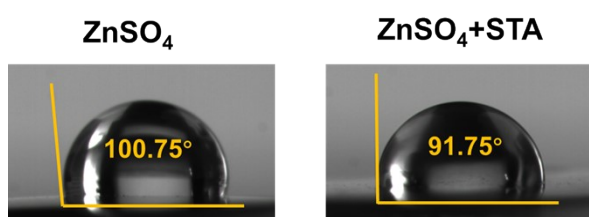

**Fig. S2** Contact angle measurement on Zn foil in the 1 mol L<sup>-1</sup> ZnSO<sub>4</sub> with/without STA.

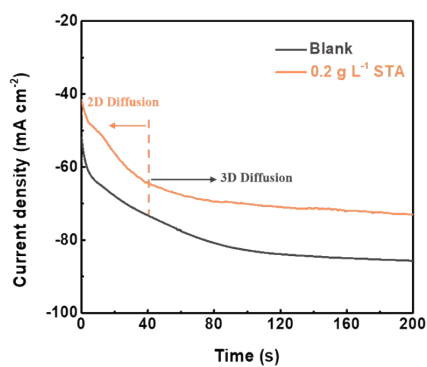

**Fig. S3** Chronoamperometry curves indicating Zn<sup>2+</sup> diffusion process of Zn electrode under different electrolyte system.

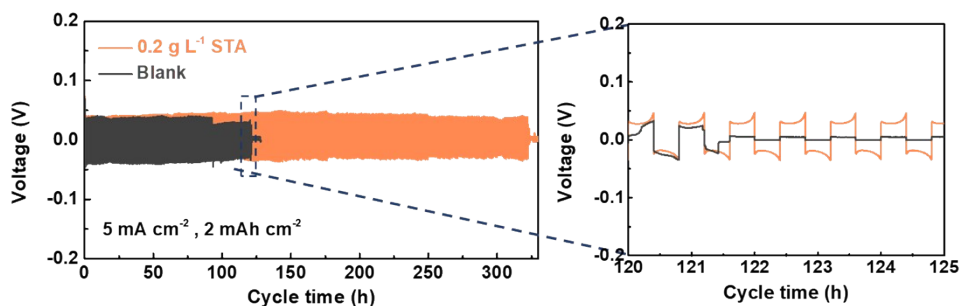

**Fig. S4** Voltage-time profiles of Zn||Zn symmetric cells in  $1 \text{ mol L}^{-1} \text{ ZnSO}_4$  with/without STA at  $5 \text{ mA cm}^{-2}$  with capacity of  $2 \text{ mAh cm}^{-2}$ .

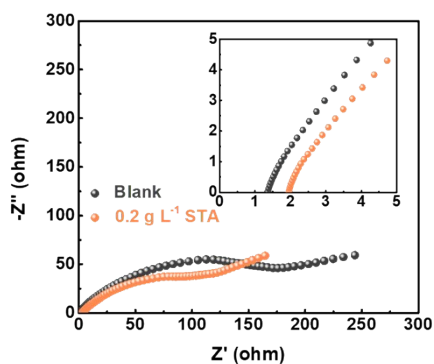

**Fig. S5** The electrochemical impedance spectroscopy (EIS) plots of the Zn||Zn symmetric cells in  $1 \text{ mol L}^{-1} \text{ ZnSO}_4$  with/without STA.

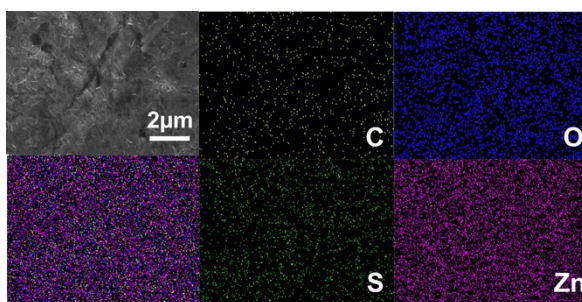

**Fig. S6** EDS analysis of Zn anodes after 10 cycles at a current density of  $10 \text{ mA cm}^{-2}$  and  $2 \text{ mAh cm}^{-2}$  in Zn||Zn symmetric cells with STA additives.

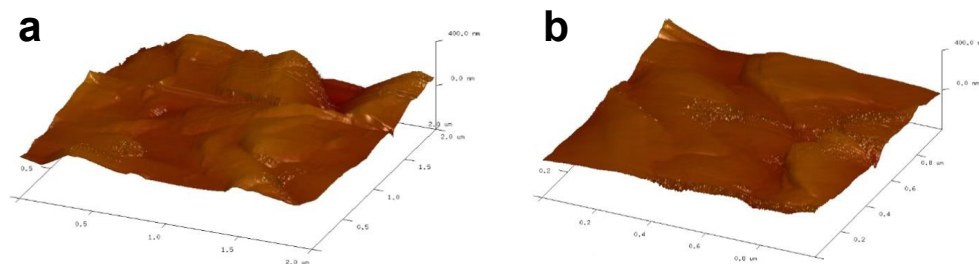

**Fig. S7** AFM images of Zn anodes after 10 cycles at  $10 \text{ mA cm}^{-2}$  with capacity of  $2 \text{ mAh cm}^{-2}$  in (a) blank electrolyte and (b) electrolyte with STA.

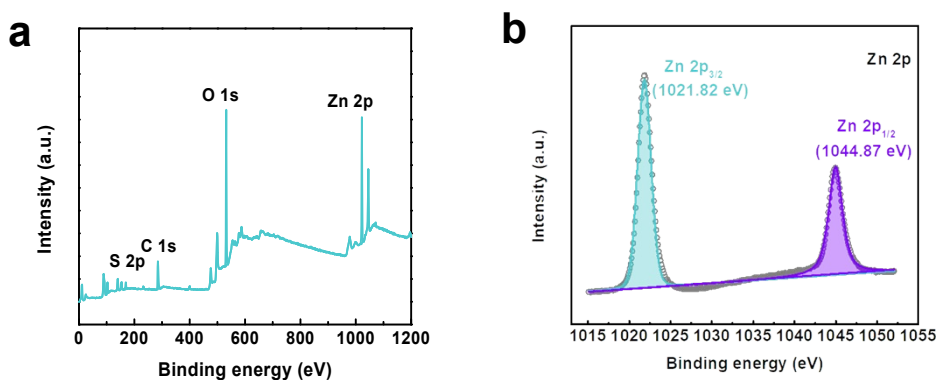

**Fig. S8** XPS spectra of (a) the total spectrum and (b) Zn 2p spectrum of Zn anode after 10 cycles with  $0.2 \text{ g L}^{-1}$  STA.

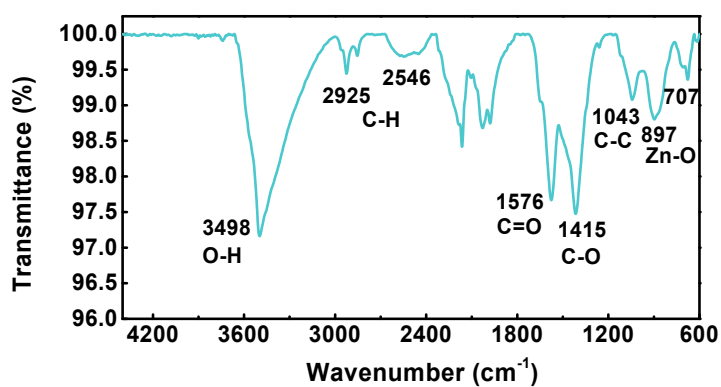

**Fig. S9** IR spectra of STA adsorbed on the Zn foil.

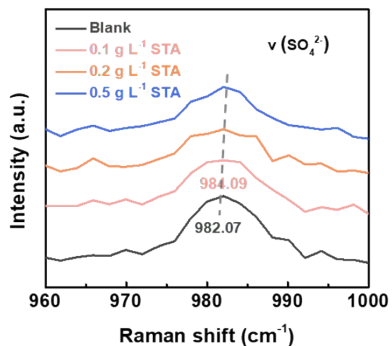

**Fig. S10** Raman spectra of pure  $\text{ZnSO}_4$  and electrolytes containing different concentrations STA.

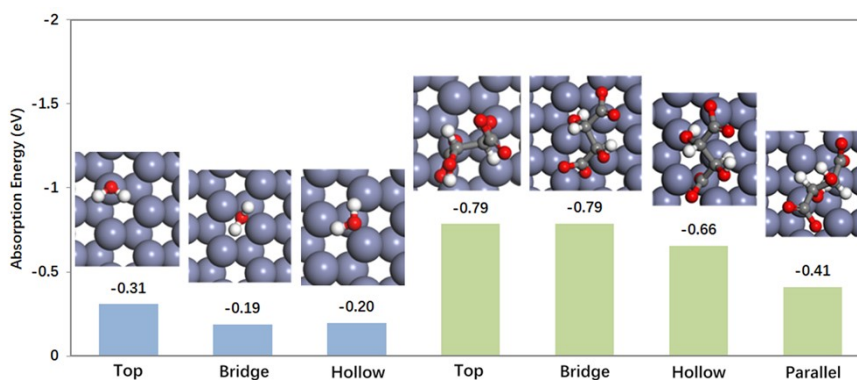

**Fig. S11** Absorption energy comparison of  $\text{H}_2\text{O}$  and STA on Zn (002) crystal plane, insets show the corresponding adsorbed models for different situations.

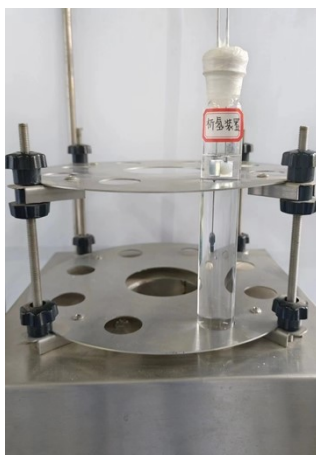

**Fig. S12** Schematic diagram of hydrogen evolution device.

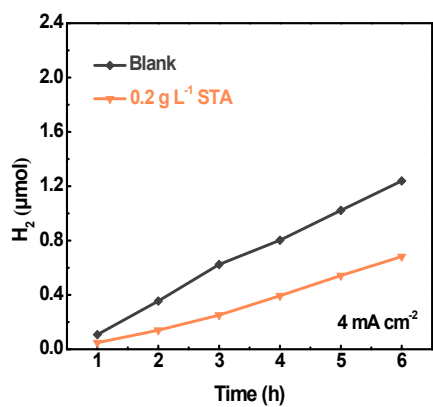

**Fig. S13** Graph of hydrogen precipitated content with time in different electrolytes at the current density of  $4 \text{ mA cm}^{-2}$ .

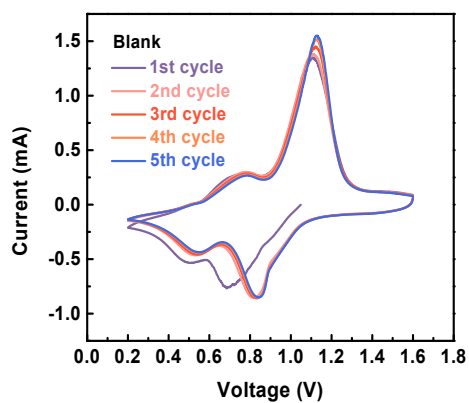

**Fig. S14** The CV curves of the  $\text{Zn}||\text{V}_2\text{O}_5$  cells using blank electrolyte at the scan rate of  $1 \text{ mV s}^{-1}$ .

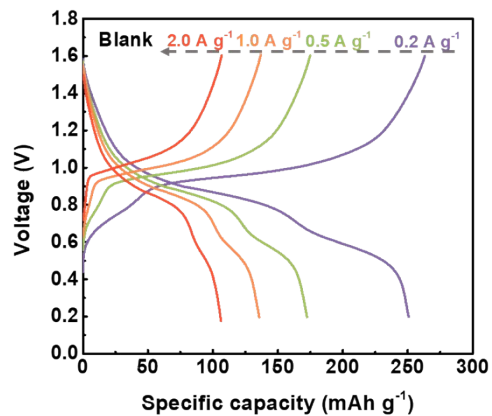

**Fig. S15** The discharge/charge curves of Zn||V<sub>2</sub>O<sub>5</sub> cells from 0.2 A g<sup>-1</sup> to 2 A g<sup>-1</sup> using blank electrolyte.

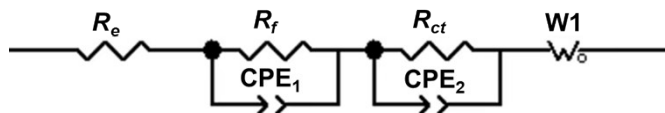

**Fig. S16** The equivalent circuits corresponding to Fig. 6d.

|            | 0.2 g L <sup>-1</sup> STA | Error (%) | Blank         | Error (%) |
|------------|---------------------------|-----------|---------------|-----------|
| $R_e$      | 2.817                     | 1.1583    | 2.624         | 1.1583    |
| $R_f$      | 3.168                     | 4.8084    | 9.221         | 4.8084    |
| $R_{ct}$   | 25.51                     | 5.8726    | 31.83         | 5.8726    |
| <b>Sum</b> | <b>31.495</b>             |           | <b>43.675</b> |           |

**Table S1** The fitting results of the simulated equivalent circuit.

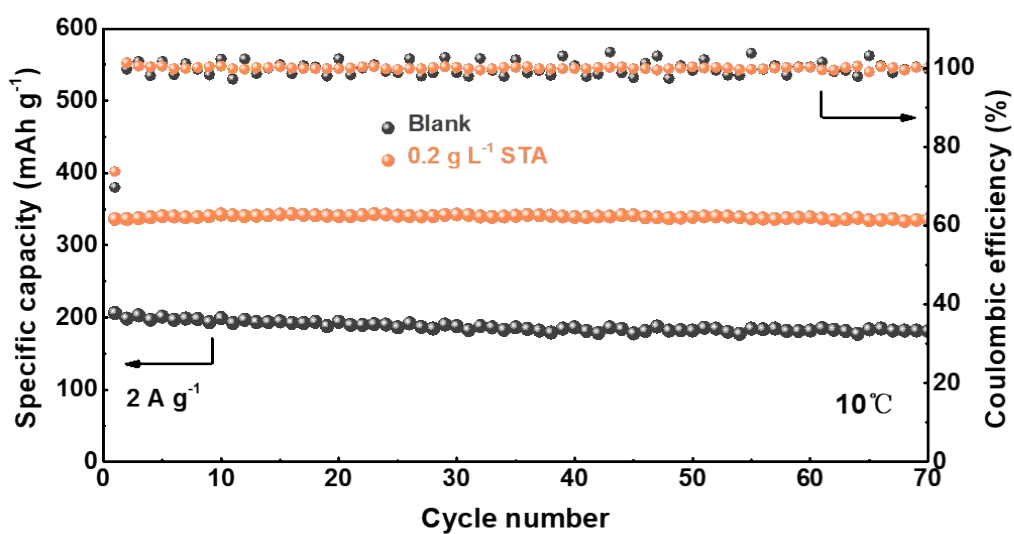

**Fig. S17** Long-term cycling performance of the Zn||V<sub>2</sub>O<sub>5</sub> cells in the electrolyte with/without the STA additive at 2 A g<sup>-1</sup> at 10°C.

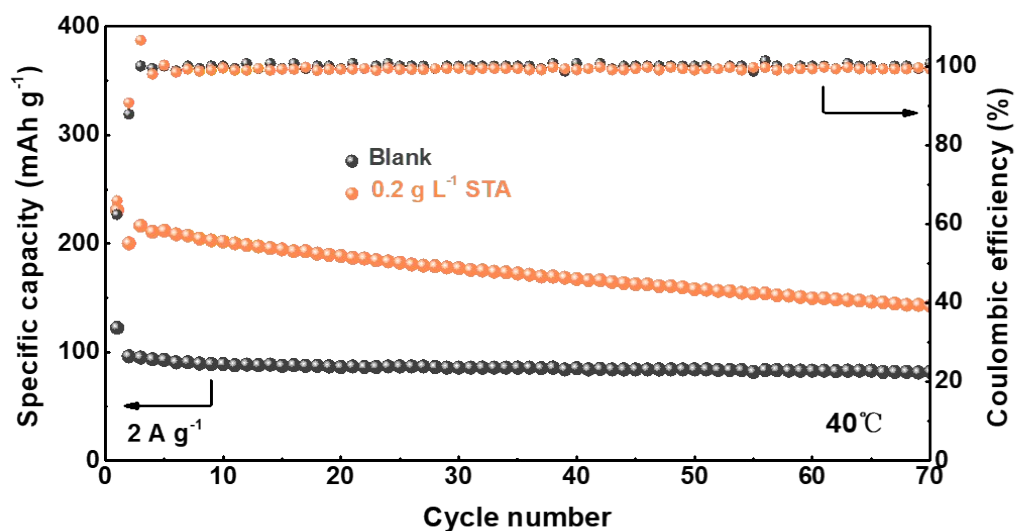

**Fig. S18** Long-term cycling performance of the Zn||V<sub>2</sub>O<sub>5</sub> cells in the electrolyte with/without the STA additive at 2 A g<sup>-1</sup> at 40°C.
